# Supplementary material for: Lipid composition and molecular interactions change with depth in the avian stratum corneum to regulate cutaneous water loss
Source: Oxford University Press journal article supplement (doi:10.1242/jeb.125310), 2015-10-01
Supplement: jeb125310supp.pdf [file jeb125310supp.pdf]

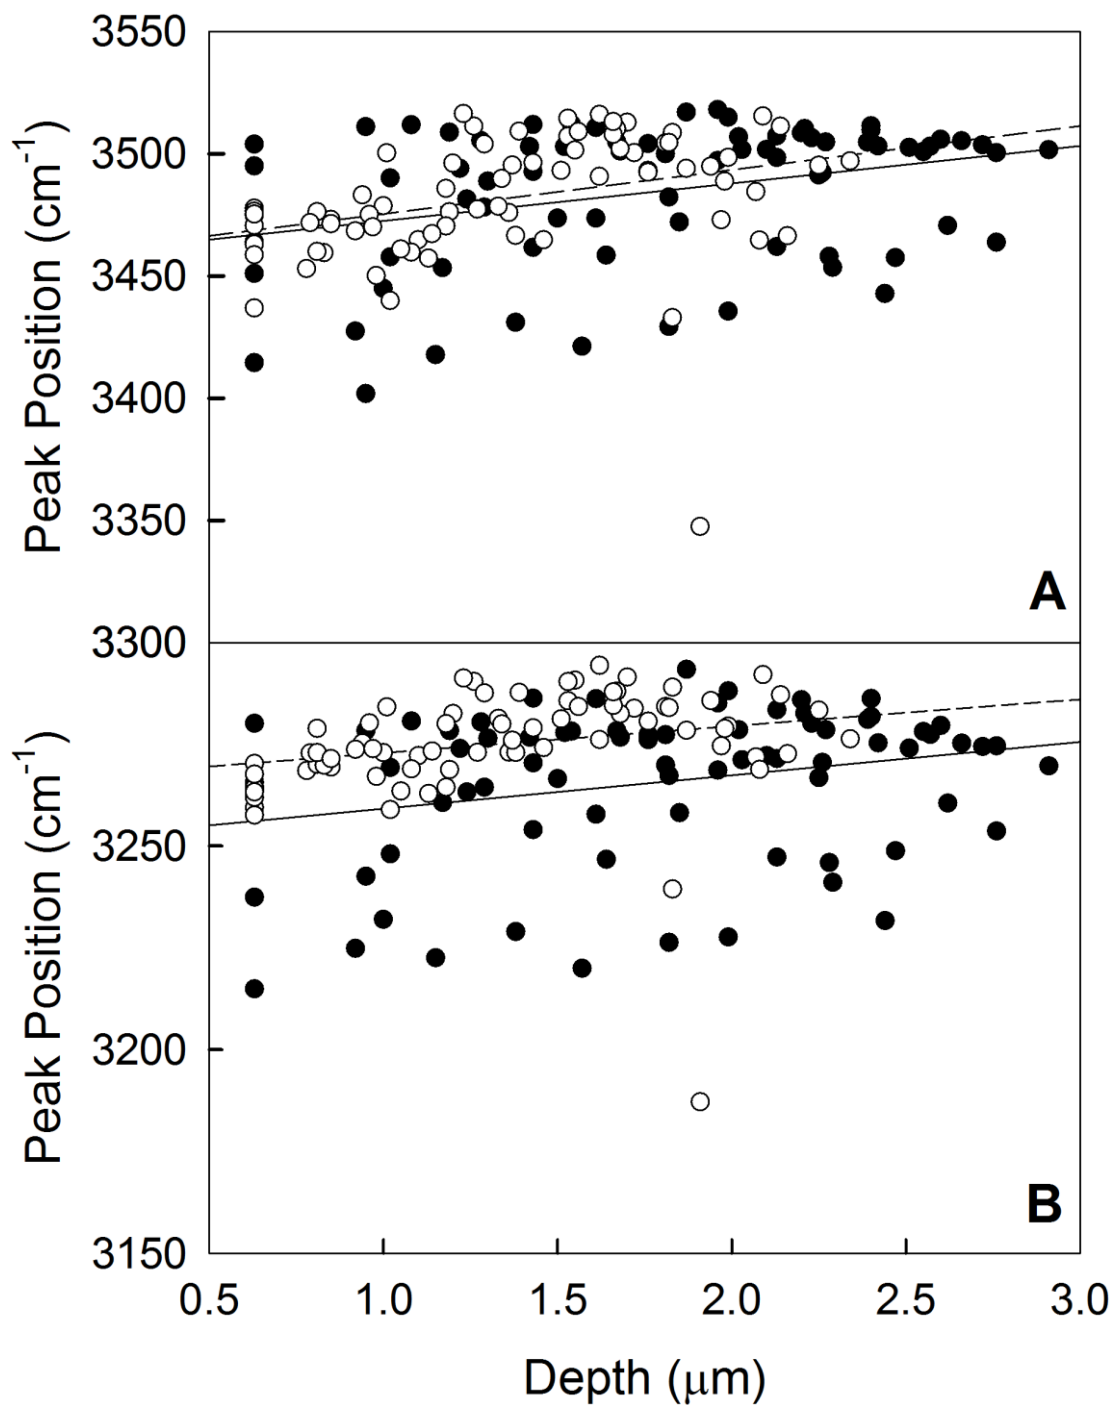

**Fig. S1.** (A) Change in peak position for the high energy OH stretching peak as a function of stratum corneum depth. Both treatment groups are indicated by black circles. (B) Change in peak position for the low energy OH stretching peak as a function of stratum corneum depth. Depth is based on the maximum penetration of an evanescent wave at  $3400\text{ cm}^{-1}$ . Summer birds are indicated by black circles and solid line, winter birds are indicated by white circles and dashed line.

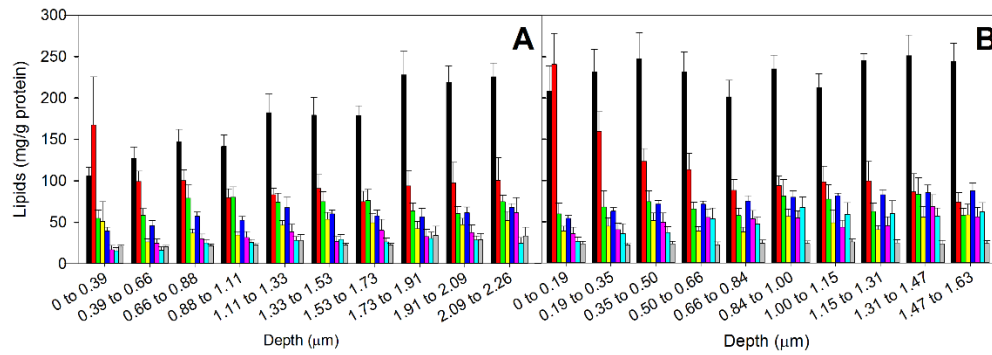

**Fig. S2.** Summary of lipids (mg/g protein) at each depth increment for Summer (A) and Winter (B) House Sparrows. Black = Free fatty acids, Red = Cholesterol ester, Green = Triacylglycerols, Yellow = Fatty acid methyl esters, Dark Blue = Cerebrosides, Dark Pink = Ceramide I, Light Blue = Ceramide II, Gray = Cholesterol.
